# Supplementary material for: Pneumococcal pericarditis in a patient with newly diagnosed diabetes mellitus: a case report
Source: Springer Nature journal article supplement (doi:10.1186/s13256-022-03548-8), 2022-09-29
Supplement: MOESM1 [file 23553690]

### Additional file 1. Laboratory values at first presentation

|                                     | Venous blood | Arterial blood | Urine |
|-------------------------------------|--------------|----------------|-------|
| CRP (mg/L)                          | 341          | -              | -     |
| Hemoglobin (mmol/L)                 | 8.4          | -              | -     |
| Hematocrit (L/L)                    | 0.42         | -              | -     |
| MCV (fl)                            | 102          | -              | -     |
| Thrombocytes (x10 <sup>9</sup> /L)  | 240          | -              | -     |
| Leukocytes (x10 <sup>9</sup> /L)    | 12.6         | -              | -     |
| Microscopic differential:           |              |                |       |
| - Basophils (x10 <sup>9</sup> /L)   | 0.0          |                |       |
| - Eosinophils (x10 <sup>9</sup> /L) | 0.0          |                |       |
| - Neutrophils (x10 <sup>9</sup> /L) | 10.9         |                |       |
| - Lymphocytes (x10 <sup>9</sup> /L) | 1.1          |                |       |
| - Monocytes (x10 <sup>9</sup> /L)   | 0.6          |                |       |
| - Immature neutrophils (%)          | 1            |                |       |
| - Toxic granulation                 | 1+           |                |       |
| - Hypersegmentation                 | present      |                |       |
| Creatinine (umol/L)                 | 71           | -              | -     |
| Urea (mmol/L)                       | 11           | -              | -     |
| Sodium (mmol/L)                     | 129          | -              | -     |
| Potassium (mmol/L)                  | 6.2          | -              | -     |
| Total bilirubin (umol/L)            | 10           | -              | -     |
| Alkaline phosphatase (U/L)          | 145          | -              | -     |
| GGT (U/L)                           | 55           | -              | -     |
| ALT (U/L)                           | 148          | -              | -     |
| AST (U/L)                           | 245          | -              | -     |
| Lipase (U/L)                        | 89           | -              | -     |
| LD (U/L)                            | 524          | -              | -     |
| CK (U/L)                            | 39           | -              | -     |
| Troponin-T (ug/L)                   | 0.020        | -              | -     |
| Glucose (mmol/L)                    | 31.6         | -              | -     |
| pH                                  | 7.29         | 7.49           | -     |
| pCO <sub>2</sub> (kPa)              | 6.7          | 3.5            | -     |
| pO <sub>2</sub> (kPa)               | 4.8          | 12.6           | -     |
| HCO <sub>3</sub> (mmol/L)           | 23.4         | 19.4           | -     |
| BE (mmol/L)                         | -3.6         | -2.4           | -     |
| sO <sub>2</sub> (%)                 | 55           | 97             | -     |
| Ketones                             | -            | -              | 2+    |
| Sediment analysis:                  |              |                |       |
| - Erythrocytes (/uL)                |              |                | 77    |
| - Leukocytes (/uL)                  |              |                | 27    |

Abbreviations: ALT, alanine transaminase; AST, aspartate transaminase; BE, base excess; CK, creatine kinase; CRP, C-reactive protein; GGT, gamma-glutamyl transferase; HCO<sub>3</sub>, bicarbonate; LD, lactate dehydrogenase; MCV, mean corpuscular volume; pCO<sub>2</sub>, partial pressure of carbon dioxide; pH, potential of hydrogen; pO<sub>2</sub>, partial pressure of oxygen; sO<sub>2</sub>, oxygen saturation.
