# Supplementary material for: Pneumococcal pericarditis in a patient with newly diagnosed diabetes mellitus: a case report
Source: Springer Nature journal article supplement (doi:10.1186/s13256-022-03548-8), 2022-09-29
Supplement: MOESM2 [file 23553690]

## Additional file 2. Medication administered from admission until the sudden clinical deterioration

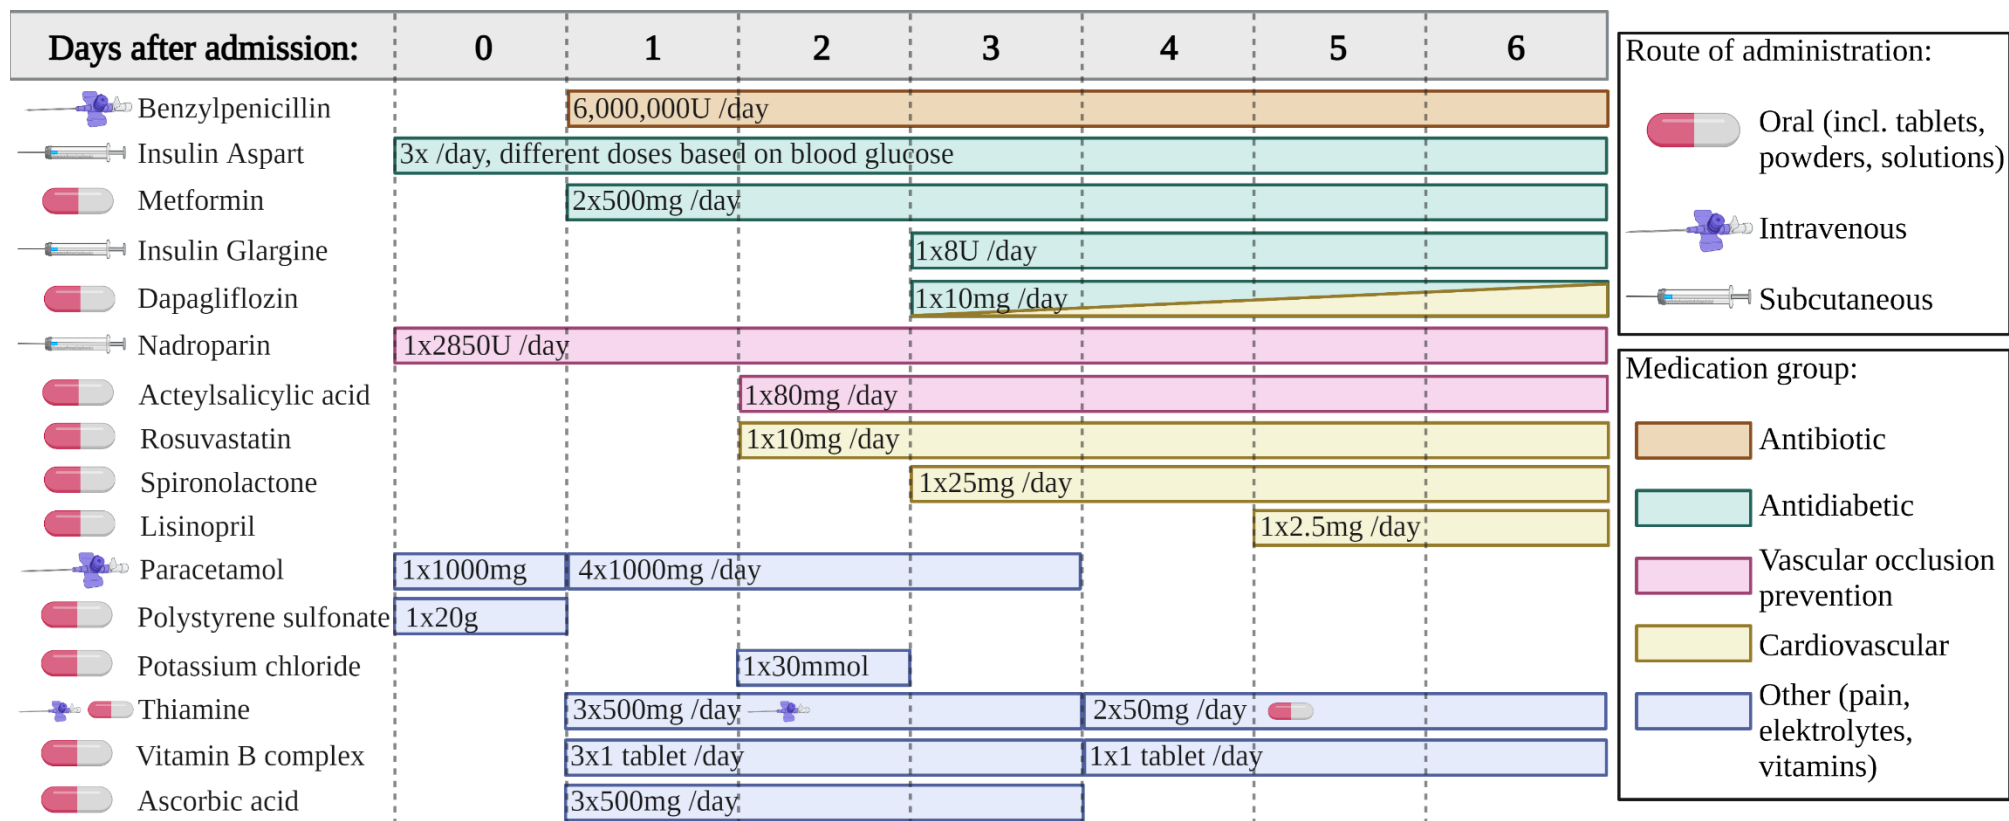

Abbreviations: g, gram; incl., including; mg, milligram; U, units.  
Figure created with BioRender.com.
